# Supplementary material for: β-Cyclodextrin-functionalized Ti3C2Tx MXene nanohybrids as innovative signal amplifiers for the electrochemical sandwich-like immunosensing of squamous cell carcinoma antigen
Source: Royal Society of Chemistry journal article supplement (doi:10.1039/d2ay01716d), 2023-01-01
Supplement: d2ay01716d1.pdf [file d2ay01716d1.pdf]

## Supporting information

### **$\beta$ -Cyclodextrin functionalized $Ti_3C_2T_x$ MXenes nanohybrids as innovative signal amplification for electrochemical sandwich-like immunosensing of squamous cell carcinoma antigen**

Yuling Jiang<sup>b#</sup>, Miao Yang<sup>a#</sup>, Mingyao Yu<sup>d</sup>, Lingling Huang<sup>c\*</sup>, Yue Ke<sup>a\*</sup>, Lei Yang<sup>a\*</sup>

<sup>a</sup> Department of Stomatology, Xiangyang Central Hospital, Affiliated Hospital Of Hubei University of Arts and Science, Xiangyang 441000, PR China

<sup>b</sup> Department of stomatology, Xiangyang No.1 People's Hospital, Hubei University of Medicine, Xiangyang 441053, PR China

<sup>c</sup> Department of Stomatology, The First Affiliated Hospital of Fujian Medical University, Fuzhou 350001, PR China

<sup>d</sup> Department of oral medicine, Xiangyang Polytechnic, Xiangyang 441006, PR China

\* Corresponding author:

E-mail: yang18986353040@163.com (Lei Yang);

keyue1108@sina.com (Yue Ke);

huanglings@163.com (Lingling Huang).

<sup>#</sup>These authors contributed equally to this work.

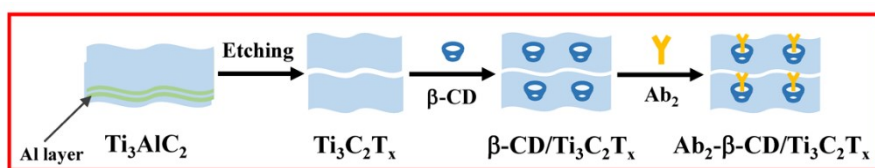

**Scheme S1.** The preparation procedures for  $\text{Ab}_2\text{-}\beta\text{-CD}/\text{Ti}_3\text{C}_2\text{T}_x$ .

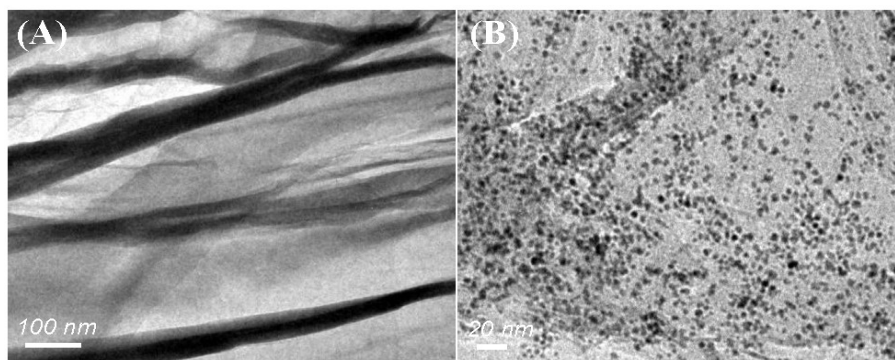

**Figure S1.** The TEM images of GN (A) and Au/GN (B).

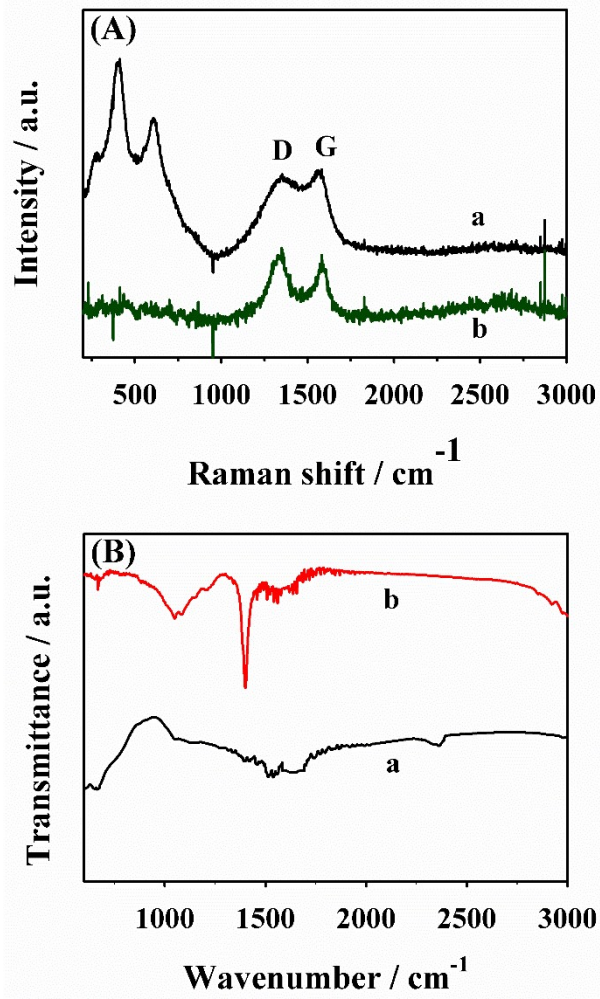

**Figure S2.** The (A) Raman and (B) FT-IR spectras of  $\text{Ti}_3\text{C}_2\text{T}_x$  MXenes (a) and  $\beta\text{-CD}/\text{Ti}_3\text{C}_2\text{T}_x$  nano hybrid (b).

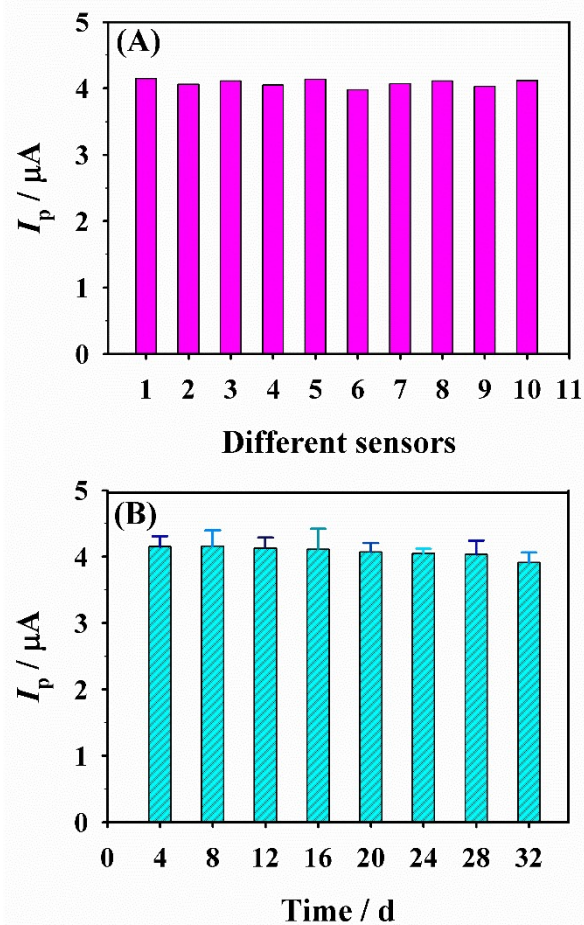

**Figure S3.** The peak current responses from  $Cu^0$  at (A) ten independently fabricated immunosensors and (B) the immunosensors with different storage times (day).

**Table S1.** Comparison of different Sandwich-like electrochemical sensors for the detection of SCCA.

| Signal amplification                               |                    | Linearity / ng mL <sup>-1</sup>    | LOD / pg mL <sup>-1</sup> | Reference |
|----------------------------------------------------|--------------------|------------------------------------|---------------------------|-----------|
| Carrier                                            | Probe or catalyzer |                                    |                           |           |
| GN                                                 | Pt/PdCu            | 10 <sup>-4</sup> - 1.0; 1.0 - 30.0 | 0.25                      | 1         |
| Pillar[5]arene/ Pd/MoS <sub>2</sub>                | Thionine           | 10 <sup>-3</sup> - 10.0            | 0.14                      | 2         |
| Na-Mont-PANI                                       | AuNPs              | 10 <sup>-4</sup> - 5.0             | 0.3                       | 3         |
| Co <sub>3</sub> O <sub>4</sub> @CeO <sub>2</sub>   | Au@Pt              | 10 <sup>-4</sup> - 80.0            | 0.033                     | 4         |
| β-CD/Ti <sub>3</sub> C <sub>2</sub> T <sub>x</sub> | Free               | 5×10 <sup>-5</sup> -20.0           | 0.01                      | This work |

## Reference

- [1] Y. Liu, H. Ma, J. Gao, D. Wu, X. Ren, T. Yan, X. Pang, Q. Wei, Ultrasensitive electrochemical immunosensor for SCCA detection based on ternary Pt/PdCu nanocube anchored on three-dimensional graphene framework for signal amplification, *Biosensors and Bioelectronics* 79 (2016) 71-78.
- [2] X. Qian, X. Zhou, Q. Qu, L. Li, L. Yang, Ultrasensitive and robust electrochemical sensing platform for the detection of squamous cell carcinoma antigen using water-soluble pillar [5] arene-Pd/MoS<sub>2</sub> nanocomposites, *Electrochimica Acta* 313 (2019) 235-244.
- [3] H. Jia, P. Gao, H. Ma, Y. Li, J. Gao, B. Du, Q. Wei, Ultrasensitive electrochemical immunosensor for squamous cell carcinoma antigen detection using lamellar montmorillonite-gold nanostructures as signal amplification, *Talanta* 132 (2015) 803-808.
- [4] Y. Li, Y. Zhang, F. Li, J. Feng, M. Li, L. Chen, Y. Dong, Ultrasensitive electrochemical immunosensor for quantitative detection of SCCA using Co<sub>3</sub>O<sub>4</sub>@ CeO<sub>2</sub>-Au@ Pt nanocomposite as enzyme-mimetic labels, *Biosensors and Bioelectronics* 92 (2017) 33-39.
